# Cuffed versus Uncuffed Endotracheal Tubes in Pediatric Anesthesia

## *The Debate Should Finally End*

IN this issue of ANESTHESIOLOGY, Sathyamoorthy *et al.*<sup>1</sup> describe three cases of postextubation airway swelling in young infants. The cases are noteworthy because the endotracheal tube used in all three infants was a recently developed cuffed endotracheal tube called the Microcuff (Kimberly-Clark, Roswell, GA), which has been specifically designed for use in pediatric anesthesia. It differs from a traditional cuffed endotracheal tube in two major modifications: first, the cuff is made of ultrathin (10 microns) polyurethane, which allows a more effective tracheal seal at pressures below those known to cause tracheal mucosa pressure necrosis; and second, the cuff is physically located more distally on the endotracheal tube shaft, facilitated by the omission of the Murphy eye. This latter feature more reliably places the cuff below the nondistensible cricoid ring and theoretically reduces the chance of an accidental main bronchus intubation.

As Sathyamoorthy *et al.* demonstrate,<sup>1</sup> these innovations do not guarantee that tracheal injury will not occur. In fact, the report is important because it reminds us that postextubation stridor (*i.e.*, airway injury and swelling) can occur after tracheal intubation with any type of endotracheal tube; however, it does not implicate the Microcuff as a unique offender. The infants in cases 1 and 2, who were born preterm and weighed less than 3 kg, were intubated with a size 3.0 Microcuff tube, but the manufacturer recommends this size only for full-term infants weighing more than 3 kg. The 3-week-old infant presented in case 3 was born at term and weighed 4 kg at the time of intubation with a size 3.5 Microcuff tube, but the manufacturer recommends this size tube only for infants from 8 months to less than 2 yr of age.\*

\*[http://kchealthcare.com/media/74430/microcuff%20brochure\\_pediatic\\_h8346\\_final.pdf](http://kchealthcare.com/media/74430/microcuff%20brochure_pediatic_h8346_final.pdf). Accessed November 13, 2012.

Accepted for publication November 29, 2012. The authors are not supported by, nor maintain any financial interest in, any commercial activity that may be associated with the topic of this article.

Copyright © 2013, the American Society of Anesthesiologists, Inc. Lippincott Williams & Wilkins. Anesthesiology 2013; 118:500–1

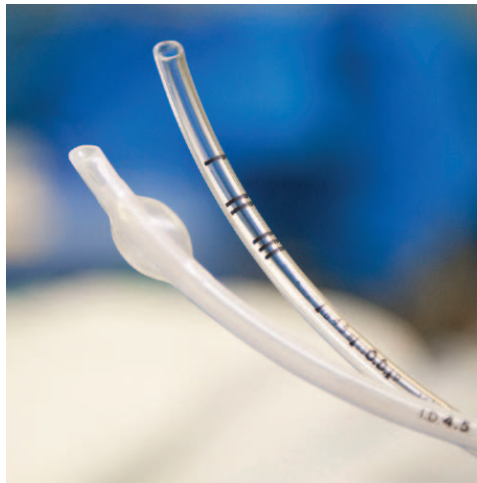

***“Except for unique clinical circumstances ... there is no longer a feasible role for the use of the uncuffed tube in pediatric anesthesia....”***

tubes are required until the pediatric larynx goes through a transformation from cone-shaped to cylindrical at 8 yr of age. To this day, authoritative textbooks on pediatric anesthesia still claim that this occurs at or around the age of 8 yr and is responsible for the ability of the pediatric larynx to safely accommodate a cuffed endotracheal tube. Even if this were true (it is not),<sup>4</sup> it simply does not matter.

To be clear, we need to distinguish between two distinct populations under consideration. The largest population of children that requires tracheal intubation most often comprises those children of any age who undergo general anesthesia for medical or surgical procedures. The use of an uncuffed tube is generally safe, and associated with a low incidence of postextubation stridor, but there are drawbacks to having a ventilation leak around the tube. These include an inaccurate capnographic tracing,<sup>5</sup> inaccurate spirometric tidal volume measurement, inaccurate end-tidal anesthetic level measurement, waste and increased cost of inhaled

In the three described infants, the use of Microcuff tube sizes greater than that recommended by the manufacturer was likely more responsible for the airway swelling than the tube and cuff design.

Careful examination of the literature leads us to believe that the most important cause of endotracheal tube related airway damage is actually the *lack* of a cuff. In the 1960s, when neonatal care was improving at an exponential pace, oral or nasal tracheal intubation began to replace tracheostomy.<sup>2,3</sup> Uncuffed endotracheal tubes were preferred because the absence of a cuff allowed for a relatively larger internal diameter endotracheal tube. This allowed easier suctioning of secretions and a lower resistance to spontaneous ventilation. Since that time, many authors have promulgated, without evidence, the notion that uncuffed

◆ This Editorial View accompanies the following article: Sathyamoorthy MK, Lerman J, Lakshminrusimha S, Feldman D: Inspiratory stridor after tracheal intubation with a Microcuff® tracheal tube in three young infants. ANESTHESIOLOGY 2013; 118:748–50.

anesthetics,<sup>6,7</sup> increased pollution of the operating room environment, increased airway fire risk, possible need to change the endotracheal tube to a different size<sup>5</sup> (often only recognized after the surgical procedure has begun), lack of ability to regulate the tracheal seal with change in respiratory system compliance, and an increased risk of microaspiration.<sup>8</sup> On the other hand, all types of cuffed endotracheal tubes have been shown to be safe in pediatric patients.<sup>5,7,9–11</sup> Claims that cuffed endotracheal tubes predispose to glottic injury or an increased chance of bronchial intubation based on mathematical analyses of tracheal lengths<sup>12,13</sup> have not been substantiated clinically.

The smaller but probably more important population of interest is those children (especially neonates) who are intubated for prolonged periods. Although the incidence of intubation-related subglottic stenosis has steadily declined over the past several decades, it continues to be a significant clinical problem. Studies of freshly extubated neonatal larynges demonstrate damage to all areas of the glottic and subglottic regions.<sup>14–17</sup> The rigid cricoid ring and the vocal folds are particularly susceptible to damage from mucosal shear because of the lack of any substantial submucosal layer in these areas. This is most likely what happens when an uncuffed endotracheal tube is used, which has a large enough external diameter to provide adequate ventilation without an excessive leak, especially with movement of the infants' head and neck. But evidence of the clinical efficacy of cuffed endotracheal tubes in the neonatal setting is absent; thus, neonatologists have not been as eager as pediatric anesthesiologists to transition to cuffed endotracheal tubes in their practice.

Sathyamoorthy's report has provided us with the opportunity to emphasize that all types of endotracheal tubes have the potential to cause damage, and there are likely many other factors (previous intubations, patient movement, coexisting morbidity, *etc.*) that play a significant role in the generation of airway edema and scarring. Nevertheless, all children requiring tracheal intubation should benefit from a standard type of endotracheal tube that is associated with the best evidenced-based outcomes. This endotracheal tube should contain a high-volume, low-pressure cuff, with a standard ratio of internal to external diameter,<sup>12</sup> and clear length markers along the tube. Anesthesia and intensive care practitioners should establish a standard routine for the measurement of endotracheal tube cuff pressures at regular and frequent intervals in patients ventilated for prolonged periods.

Once considered mandatory for the young pediatric airway, the uncuffed endotracheal tube has now been reduced to a pessimistic meta-induction from the history of anesthesiology. Except for unique clinical circumstances (*e.g.*, purposeful bronchial intubation for neonatal thoracic surgery and lung isolation), there is no longer a feasible role for the use of the uncuffed tube in pediatric anesthesia, or in chronically ventilated children beyond the neonatal period. Further research should be directed toward optimizing endotracheal

tube standards in the neonatal unit, where the greatest incidence of airway damage occurs.

**Ronald S. Litman, D.O., F.A.A.P., Lynne G. Maxwell, M.D., F.A.A.P.,** Department of Anesthesiology and Critical Care, Perelman School of Medicine at the University of Pennsylvania, The Children's Hospital of Philadelphia, Philadelphia, Pennsylvania. litmanr@email.chop.edu

## References

1. Sathyamoorthy MK, Lerman J, Lakshminrusimha S, Feldman D: Inspiratory stridor after tracheal intubation with a Microcuff® tracheal tube in three young infants. *ANESTHESIOLOGY* 2013; 118:748–50
2. McDonald IH, Stocks JG: Prolonged nasotracheal intubation. A review of its development in a paediatric hospital. *Br J Anaesth* 1965; 37:161–73
3. Allen TH, Steven IM: Prolonged endotracheal intubation in infants and children. *Br J Anaesth* 1965; 37:566–73
4. Litman RS, Weissend EE, Shibata D, Westesson PL: Developmental changes of laryngeal dimensions in unparalyzed, sedated children. *ANESTHESIOLOGY* 2003; 98:41–5
5. Weiss M, Dullenkopf A, Fischer JE, Keller C, Gerber AC; European Paediatric Endotracheal Intubation Study Group: Prospective randomized controlled multi-centre trial of cuffed or uncuffed endotracheal tubes in small children. *Br J Anaesth* 2009; 103:867–73
6. Eschertzhuber S, Salgo B, Schmitz A, Roth W, Frotzler A, Keller CH, Gerber AC, Weiss M: Cuffed endotracheal tubes in children reduce sevoflurane and medical gas consumption and related costs. *Acta Anaesthesiol Scand* 2010; 54:855–8
7. Khine HH, Corrdry DH, Kettrick RG, Martin TM, McCloskey JJ, Rose JB, Theroux MC, Zagnoev M: Comparison of cuffed and uncuffed endotracheal tubes in young children during general anesthesia. *ANESTHESIOLOGY* 1997; 86:627–31; discussion 27A
8. Gopalareddy V, He Z, Soundar S, Bolling L, Shah M, Penfil S, McCloskey JJ, Mehta DI: Assessment of the prevalence of microaspiration by gastric pepsin in the airway of ventilated children. *Acta Paediatr* 2008; 97:55–60
9. Murat I: Cuffed tubes in children: A 3-year experience in a single institution. *Paediatr Anaesth* 2001; 11:748–9
10. Deakers TW, Reynolds G, Stretton M, Newth CJ: Cuffed endotracheal tubes in pediatric intensive care. *J Pediatr* 1994; 125:57–62
11. Newth CJ, Rachman B, Patel N, Hammer J: The use of cuffed versus uncuffed endotracheal tubes in pediatric intensive care. *J Pediatr* 2004; 144:333–7
12. Weiss M, Dullenkopf A, Gysin C, Dillier CM, Gerber AC: Shortcomings of cuffed paediatric tracheal tubes. *Br J Anaesth* 2004; 92:78–88
13. Ho AM, Aun CS, Karmakar MK: The margin of safety associated with the use of cuffed paediatric tracheal tubes. *Anaesthesia* 2002; 57:173–5
14. Fan LL, Flynn JW, Pathak DR: Risk factors predicting laryngeal injury in intubated neonates. *Crit Care Med* 1983; 11:431–3
15. Sato K, Nakashima T: Histopathologic changes in laryngeal mucosa of extremely low-birth weight infants after endotracheal intubation. *Ann Otol Rhinol Laryngol* 2006; 115:816–23
16. Gould SJ, Howard S: The histopathology of the larynx in the neonate following endotracheal intubation. *J Pathol* 1985; 146:301–11
17. Joshi VV, Mandavia SG, Stern L, Wigglesworth FW: Acute lesions induced by endotracheal intubation. Occurrence in the upper respiratory tract of newborn infants with respiratory distress syndrome. *Am J Dis Child* 1972; 124:646–9
